# Supplementary material for: MESSAGEix-Materials v1.0.0: Representation of Material Flows and Stocks in an Integrated Assessment Model
Source: Copernicus journal article supplement (doi:10.5194/egusphere-2023-3035), 2024-03-20

## Supplementary

Gamze Ünlü<sup>1,3</sup>, Florian Maczek<sup>1</sup>, Jihoon Min<sup>1</sup>, Stefan Frank<sup>1</sup>, Fridolin Glatter<sup>1</sup>, Paul Natsuo Kishimoto<sup>1</sup>, Jan Streeck<sup>3</sup>, Nina Eisenmenger<sup>3</sup>, Volker Krey<sup>1,2</sup>, Dominik Wiedenhofer<sup>3</sup>

<sup>1</sup>International Institute for Applied Systems Analysis, Laxenburg, 2361, Austria

5 <sup>2</sup>Industrial Ecology Programme and Energy Transitions Initiative, Norwegian University of Science and Technology (NTNU), Trondheim, 7491, Norway

<sup>3</sup>Institute of Social Ecology, University of Natural Resources and Life Sciences, Vienna (BOKU), Schottenfeldgasse 29, 1070 Wien

*Correspondence to:* Gamze Ünlü (unlu@iiasa.ac.at)

10

15

20

25

30

## S1 Data Sources in MESSAGEix-Materials for Parametrization

35 Below table summarizes the data sources and their purpose of use for different industry sectors that are represented in MESSAGEix-Materials.

**Table S1** Techno-economic data sources for the industries in MESSAGEix-Materials

| <b>Industry</b>                                                                                                                                                                                                                       | <b>Source</b>                                                                                                                                                                                                                                        | <b>Description</b>                                                     |
|---------------------------------------------------------------------------------------------------------------------------------------------------------------------------------------------------------------------------------------|------------------------------------------------------------------------------------------------------------------------------------------------------------------------------------------------------------------------------------------------------|------------------------------------------------------------------------|
| Aluminium                                                                                                                                                                                                                             | IEA Energy Technology Transitions for Industry, 2009 ( <a href="https://www.iea.org/reports/energy-technology-transitions-for-industry">https://www.iea.org/reports/energy-technology-transitions-for-industry</a> )                                 | Choice of relevant industry technologies                               |
|                                                                                                                                                                                                                                       | IEA ETSAP Technology Brief I10, 2012 ( <a href="https://iea-etsap.org/E-TechDS/PDF/I10_AIProduction_ER_March2012_Final%20GSOK.pdf">https://iea-etsap.org/E-TechDS/PDF/I10_AIProduction_ER_March2012_Final%20GSOK.pdf</a> )                           | Techno-economic parameters, emission factors                           |
|                                                                                                                                                                                                                                       | JRC Report Energy Efficiency and GHG Emissions: Prospective Scenarios for the Aluminium Industry ( <a href="https://publications.jrc.ec.europa.eu/repository/handle/JRC96680">https://publications.jrc.ec.europa.eu/repository/handle/JRC96680</a> ) | Techno-economic parameters                                             |
|                                                                                                                                                                                                                                       | International Aluminum Institute ( <a href="https://alucycle.world-aluminium.org/public-access/">https://alucycle.world-aluminium.org/public-access/</a> )                                                                                           | Material flows into product level, available end-of-life materials     |
|                                                                                                                                                                                                                                       | Idoine, N.E., Raycraft, E.R., Price, F., Hobbs, S.F., Deady, E.A., Everett, P., Shaw, R.A., Evans, E.J., and Mills, A.J.: World mineral production 2017-21, British Geological Survey, Nottingham, UK, 98pp., ISBN 9780852727973, 2023.              | Historical data                                                        |
| Chemicals                                                                                                                                                                                                                             | IKARUS Model <a href="https://www.energyplan.eu/othertools/national/ikarus/">https://www.energyplan.eu/othertools/national/ikarus/</a>                                                                                                               | Refinery techno-economic parameters                                    |
|                                                                                                                                                                                                                                       | PRELIM Model <a href="https://www.ucalgary.ca/energy-technology-assessment/open-source-models/prelim">https://www.ucalgary.ca/energy-technology-assessment/open-source-models/prelim</a>                                                             | Refinery techno-economic parameters                                    |
|                                                                                                                                                                                                                                       | IEA The Future of Petrochemicals, 2018 ( <a href="https://www.iea.org/reports/the-future-of-petrochemicals">https://www.iea.org/reports/the-future-of-petrochemicals</a> )                                                                           | Determining relevant industry technologies                             |
|                                                                                                                                                                                                                                       | IEA Energy Technology Perspectives 2020 ( <a href="https://www.iea.org/reports/energy-technology-perspectives-2020">https://www.iea.org/reports/energy-technology-perspectives-2020</a> )                                                            | Determining relevant industry technologies, techno-economic parameters |
|                                                                                                                                                                                                                                       | IEA Energy Technology Transitions for Industry, 2009 ( <a href="https://www.iea.org/reports/energy-technology-transitions-for-industry">https://www.iea.org/reports/energy-technology-transitions-for-industry</a> )                                 | Determining relevant industry technologies                             |
|                                                                                                                                                                                                                                       | IEA ETSAP Bioethylene Production ( <a href="https://iea-etsap.org/E-TechDS/PDF/I13IR_Bioethy_MB_Jan2013_final_GSOK.pdf">https://iea-etsap.org/E-TechDS/PDF/I13IR_Bioethy_MB_Jan2013_final_GSOK.pdf</a> )                                             | Techno-economic parameters                                             |
|                                                                                                                                                                                                                                       | IEA ETSAP Oil Refineries ( <a href="https://iea-etsap.org/E-TechDS/PDF/P04_Oil%20Ref_KV_Apr2014_GSOK.pdf">https://iea-etsap.org/E-TechDS/PDF/P04_Oil%20Ref_KV_Apr2014_GSOK.pdf</a> )                                                                 | Techno-economic parameters                                             |
| Tuna, P., Hulteberg, C., and Ahlgren, S.: Techno-economic assessment of nonfossil ammonia production, Environ. Prog. Sustain., 33, 1290–1297, <a href="https://doi.org/10.1002/EP.11886">https://doi.org/10.1002/EP.11886</a> , 2014. | Techno-economic parameters                                                                                                                                                                                                                           |                                                                        |

|  |                                                                                                                                                                                                                                                                                                                                                                                                                    |                                                                                   |
|--|--------------------------------------------------------------------------------------------------------------------------------------------------------------------------------------------------------------------------------------------------------------------------------------------------------------------------------------------------------------------------------------------------------------------|-----------------------------------------------------------------------------------|
|  | IEA Ammonia Technology Roadmap, 2021 ( <a href="https://www.iea.org/reports/ammonia-technology-roadmap">https://www.iea.org/reports/ammonia-technology-roadmap</a> )                                                                                                                                                                                                                                               | Historical data                                                                   |
|  | Yara Fertilizer Industry Handbook, 2018 <a href="https://www.yara.com/siteassets/investors/057-reports-and-presentations/other/2018/fertilizer-industry-handbook-2018.pdf/">https://www.yara.com/siteassets/investors/057-reports-and-presentations/other/2018/fertilizer-industry-handbook-2018.pdf/</a>                                                                                                          | Historical data                                                                   |
|  | FAOSTAT fertilizer trade, 2018 <a href="https://www.fao.org/in-focus/remaining-fertilizer-trade-tracker/en">https://www.fao.org/in-focus/remaining-fertilizer-trade-tracker/en</a><br>IEA Energy Technology Transitions for Industry, 2009 ( <a href="https://www.iea.org/reports/energy-technology-transitions-for-industry">https://www.iea.org/reports/energy-technology-transitions-for-industry</a> )         | Historical trade data<br><br>Conventional technologies techno-economic parameters |
|  | Carina Oliveira. (2021). ADVANCED METHANOL TO OLEFINS PROCESS - TECHNOLOGY FACTSHEET. TNO. <a href="https://energy.nl/media/data/Technology-Factsheet-Advanced-methanol-to-olefins.pdf">https://energy.nl/media/data/Technology-Factsheet-Advanced-methanol-to-olefins.pdf</a>                                                                                                                                     | Techno-economic parameters                                                        |
|  | Dimian, A. C., & Bildea, C. S. (2018). Energy efficient methanol-to-olefins process. Chemical Engineering Research and Design, 131, 41–54. <a href="https://doi.org/10.1016/J.CHERD.2017.11.009">https://doi.org/10.1016/J.CHERD.2017.11.009</a>                                                                                                                                                                   | Techno-economic parameters                                                        |
|  | Guillaume Gaulier & Soledad Zignago, 2010.<br>"BACI: International Trade Database at the Product-Level. The 1994-2007 Version,"<br>CEPII Working Paper 2010- 23, October 2010, CEPII.                                                                                                                                                                                                                              | Historical trade data                                                             |
|  | Geyer, R., Jambeck, J. R., & Law, K. L. (2017). Production, use, and fate of all plastics ever made. Science Advances, 3(7). <a href="https://doi.org/10.1126/SCIADV.1700782/SUPPL_FILE/1700782_SM.PDF">https://doi.org/10.1126/SCIADV.1700782/SUPPL_FILE/1700782_SM.PDF</a>                                                                                                                                       | Techno-economic parameters                                                        |
|  | Levi, P. G., & Cullen, J. M. (2018). Mapping Global Flows of Chemicals: From Fossil Fuel Feedstocks to Chemical Products. Environmental Science and Technology, 52(4), 1725–1734. <a href="https://doi.org/10.1021/acs.est.7b04573">https://doi.org/10.1021/acs.est.7b04573</a>                                                                                                                                    | Material flow data                                                                |
|  | METI (2016), Future Supply and Demand Trend of Petrochemical Products Worldwide, Tokyo, <a href="http://www.meti.go.jp/policy/mono_info_service/mono/chemistry/sekkajyukyudokou201506.html">www.meti.go.jp/policy/mono_info_service/mono/chemistry/sekkajyukyudokou201506.html</a>                                                                                                                                 | Historical data                                                                   |
|  | Methanol Institute: Global Methanol Supply and Demand Balance: <a href="https://www.methanol.org/methanol-price-supply-demand/">https://www.methanol.org/methanol-price-supply-demand/</a> , last_access: 2023, 2022.                                                                                                                                                                                              | Historical data                                                                   |
|  | Poluzzi, A., Guandalini, G., Guffanti, S., Martinelli, M., Moioli, S., Huttenhuis, P., Rexwinkel, G., Palonen, J., Martelli, E., Groppi, G., & Romano, M. C. (2022). Flexible Power and Biomass-To-Methanol Plants With Different Gasification Technologies. Frontiers in Energy Research, 9, 978. <a href="https://doi.org/10.3389/FENRG.2021.795673/BIBTEX">https://doi.org/10.3389/FENRG.2021.795673/BIBTEX</a> | Techno-economic parameters                                                        |
|  | Renewable Energy Agency (IRENA), I., & Methanol Institute. (2021). INNOVATION OUTLOOK RENEWABLE METHANOL. <a href="http://www.irena.org">www.irena.org</a>                                                                                                                                                                                                                                                         | Techno-economic parameters                                                        |
|  | Schemme, S., Breuer, J. L., Köller, M., Meschede, S., Walman, F., Samsun, R. C., Peters, R., & Stolten, D. (n.d.-a). H <sub>2</sub> -based synthetic fuels: A techno-economic comparison of alcohol, ether and hydrocarbon production. <a href="https://doi.org/10.1016/j.ijhydene.2019.05.028">https://doi.org/10.1016/j.ijhydene.2019.05.028</a>                                                                 | Techno-economic parameters                                                        |

|                |                                                                                                                                                                                                                                                                                                                                                                                                                                                                                                                                                                                                                                                                                                                                                                                                                                                        |                                                |
|----------------|--------------------------------------------------------------------------------------------------------------------------------------------------------------------------------------------------------------------------------------------------------------------------------------------------------------------------------------------------------------------------------------------------------------------------------------------------------------------------------------------------------------------------------------------------------------------------------------------------------------------------------------------------------------------------------------------------------------------------------------------------------------------------------------------------------------------------------------------------------|------------------------------------------------|
|                | S&P Global. (2020). Chemical Economics Handbook – Methanol. <a href="https://www.spglobal.com/commodityinsights/en/ci/products/methanol-chemical-economics-handbook.html">https://www.spglobal.com/commodityinsights/en/ci/products/methanol-chemical-economics-handbook.html</a>                                                                                                                                                                                                                                                                                                                                                                                                                                                                                                                                                                      | Historical data                                |
| Power Sector   | Arvesen, A., Luderer, G., Pehl, M., Bodirsky, B. L., and Hertwich, E. G.: Deriving life cycle assessment coefficients for application in Integrated Assessment Modelling, Environ. Modell. Softw., 99, 111–125, <a href="https://doi.org/10.1016/j.envsoft.2017.09.010">https://doi.org/10.1016/j.envsoft.2017.09.010</a> , 2018.                                                                                                                                                                                                                                                                                                                                                                                                                                                                                                                      | Material intensities                           |
| Iron and steel | OECD steelmaking capacity database <a href="https://stats.oecd.org/Index.aspx?datasetcode=STI_STEEL_MAKINGCAPACITY">https://stats.oecd.org/Index.aspx?datasetcode=STI_STEEL_MAKINGCAPACITY</a><br>World Steel Association ( <a href="https://www.worldsteel.org/en/dam/jcr:0474d208-9108-4927-ace8-4ac5445c5df8/World+Steel+in+Figures+2017.pdf">https://www.worldsteel.org/en/dam/jcr:0474d208-9108-4927-ace8-4ac5445c5df8/World+Steel+in+Figures+2017.pdf</a> )                                                                                                                                                                                                                                                                                                                                                                                      | Historical data, Past capacity and production  |
|                | IEA ETSAP Technology Brief I02, 2010 ( <a href="https://iea-etsap.org/E-TechDS/PDF/I02-Iron&amp;Steel-GS-AD-gct.pdf">https://iea-etsap.org/E-TechDS/PDF/I02-Iron&amp;Steel-GS-AD-gct.pdf</a> )                                                                                                                                                                                                                                                                                                                                                                                                                                                                                                                                                                                                                                                         | Techno-economic parameters                     |
|                | IEA Energy Technology Transitions for Industry, 2009 ( <a href="https://www.iea.org/reports/energy-technology-transitions-for-industry">https://www.iea.org/reports/energy-technology-transitions-for-industry</a> )                                                                                                                                                                                                                                                                                                                                                                                                                                                                                                                                                                                                                                   | Techno-economic parameters                     |
| Cement         | Cement Statistics and Information (USGS) ( <a href="https://pubs.usgs.gov/periodicals/mcs2020/mcs2020-cement.pdf">https://pubs.usgs.gov/periodicals/mcs2020/mcs2020-cement.pdf</a> )                                                                                                                                                                                                                                                                                                                                                                                                                                                                                                                                                                                                                                                                   | Historical data, regional production           |
|                | 2019 Activity Report (Cembureau) ( <a href="http://www.cembureau.eu/media/clkdda45/activity-report-2019.pdf">http://www.cembureau.eu/media/clkdda45/activity-report-2019.pdf</a> )                                                                                                                                                                                                                                                                                                                                                                                                                                                                                                                                                                                                                                                                     | Historical data                                |
|                | ADVANCE Modeling Guide for the Cement Industry, 2016 ( <a href="http://fp7-advance.eu/content/industrial-sector-cement-guideline">http://fp7-advance.eu/content/industrial-sector-cement-guideline</a> )                                                                                                                                                                                                                                                                                                                                                                                                                                                                                                                                                                                                                                               | Techno-economic parameters, emission factors   |
|                | Voldsund, M., Gardarsdottir, S., De Lena, E., Pérez-Calvo, J.-F., Jamali, A., Berstad, D., Fu, C., Romano, M., Roussanaly, S., Anantharaman, R., Hoppe, H., Sutter, D., Mazzotti, M., Gazzani, M., Cinti, G., and Jordal, K.: Comparison of Technologies for CO2 Capture from Cement Production—Part 1: Technical Evaluation, Energies, 12, 559, <a href="https://doi.org/10.3390/en12030559">https://doi.org/10.3390/en12030559</a> , 2019.<br><br>Gardarsdottir, S., De Lena, E., Romano, M., Roussanaly, S., Voldsund, M., Pérez-Calvo, J.-F., Berstad, D., Fu, C., Anantharaman, R., Sutter, D., Gazzani, M., Mazzotti, M., and Cinti, G.: Comparison of Technologies for CO2 Capture from Cement Production—Part 2: Cost Analysis, Energies, 12, 542, <a href="https://doi.org/10.3390/en12030542">https://doi.org/10.3390/en12030542</a> , 2019. | Techno-economic parameters of CCS technologies |
|                | Methodology for the free allocation of emission allowances in the EU ETS post 2012, 2009 ( <a href="https://climate.ec.europa.eu/system/files/2016-11/bm_study-project_approach_and_general_issues_en.pdf">https://climate.ec.europa.eu/system/files/2016-11/bm_study-project_approach_and_general_issues_en.pdf</a> )<br>IEA ETSAP - Technology Brief I03, 2010 ( <a href="https://iea-etsap.org/E-TechDS/PDF/I03_cement_June_2010_GS-gct.pdf">https://iea-etsap.org/E-TechDS/PDF/I03_cement_June_2010_GS-gct.pdf</a> )                                                                                                                                                                                                                                                                                                                               | Historical data, emission factors              |

## S2 Regions in MESSAGEix-Materials

45

**Table S2** Regions in MESSAGEix-Materials

|             |                                 |                                                                                                                                                                                                                                                                                                                                                                                                                                                                                                                                                                                    |
|-------------|---------------------------------|------------------------------------------------------------------------------------------------------------------------------------------------------------------------------------------------------------------------------------------------------------------------------------------------------------------------------------------------------------------------------------------------------------------------------------------------------------------------------------------------------------------------------------------------------------------------------------|
| <b>NAM</b>  | North America                   | Canada, Guam, Puerto Rico, United States of America, Virgin Islands                                                                                                                                                                                                                                                                                                                                                                                                                                                                                                                |
| <b>WEU</b>  | Western Europe                  | Andorra, Austria, Azores, Belgium, Canary Islands, Channel Islands, Cyprus, Denmark, Faeroe Islands, Finland, France, Germany, Gibraltar, Greece, Greenland, Iceland, Ireland, Isle of Man, Italy, Liechtenstein, Luxembourg, Madeira, Malta, Monaco, Netherlands, Norway, Portugal, Spain, Sweden, Switzerland, Turkey, United Kingdom                                                                                                                                                                                                                                            |
| <b>PAO</b>  | Pacific OECD                    | Australia, Japan, New Zealand                                                                                                                                                                                                                                                                                                                                                                                                                                                                                                                                                      |
| <b>EEU</b>  | Central and Eastern Europe      | Albania, Bosnia and Herzegovina, Bulgaria, Croatia, Czech Republic, The former Yugoslav Rep. of Macedonia, Hungary, Poland, Romania, Slovak Republic, Slovenia, Yugoslavia, Estonia, Latvia, Lithuania                                                                                                                                                                                                                                                                                                                                                                             |
| <b>FSU</b>  | Former Soviet Union             | Armenia, Azerbaijan, Belarus, Georgia, Kazakhstan, Kyrgyzstan, Republic of Moldova, Russian Federation, Tajikistan, Turkmenistan, Ukraine, Uzbekistan                                                                                                                                                                                                                                                                                                                                                                                                                              |
| <b>RCPA</b> | Centrally Planned Asia          | Cambodia, China (incl. Hong Kong), Korea (DPR), Laos (PDR), Mongolia, Viet Nam                                                                                                                                                                                                                                                                                                                                                                                                                                                                                                     |
| <b>CHN</b>  | China                           | China                                                                                                                                                                                                                                                                                                                                                                                                                                                                                                                                                                              |
| <b>SAS</b>  | South Asia                      | Afghanistan, Bangladesh, Bhutan, India, Maldives, Nepal, Pakistan, Sri Lanka                                                                                                                                                                                                                                                                                                                                                                                                                                                                                                       |
| <b>PAS</b>  | Other Pacific Asia              | American Samoa, Brunei Darussalam, Fiji, French Polynesia, Gilbert-Kiribati, Indonesia, Malaysia, Myanmar, New Caledonia, Papua, New Guinea, Philippines, Republic of Korea, Singapore, Solomon Islands, Taiwan (China), Thailand, Tonga, Vanuatu, Western Samoa                                                                                                                                                                                                                                                                                                                   |
| <b>MEA</b>  | Middle East and North Africa    | Algeria, Bahrain, Egypt (Arab Republic), Iraq, Iran (Islamic Republic), Israel, Jordan, Kuwait, Lebanon, Libya/SPLAJ, Morocco, Oman, Qatar, Saudi Arabia, Sudan, Syria (Arab Republic), Tunisia, United Arab Emirates, Yemen                                                                                                                                                                                                                                                                                                                                                       |
| <b>LAM</b>  | Latin America and the Caribbean | Antigua and Barbuda, Argentina, Bahamas, Barbados, Belize, Bermuda, Bolivia, Brazil, Chile, Colombia, Costa Rica, Cuba, Dominica, Dominican Republic, Ecuador, El Salvador, French Guyana, Grenada, Guadeloupe, Guatemala, Guyana, Haiti, Honduras, Jamaica, Martinique, Mexico, Netherlands Antilles, Nicaragua, Panama, Paraguay, Peru, Saint Kitts and Nevis, Santa Lucia, Saint Vincent and the Grenadines, Suriname, Trinidad and Tobago, Uruguay, Venezuela                                                                                                                  |
| <b>AFR</b>  | Sub-Saharan Africa              | Angola, Benin, Botswana, British Indian Ocean Territory, Burkina Faso, Burundi, Cameroon, Cape Verde, Central African Republic, Chad, Comoros, Cote d'Ivoire, Congo, Democratic Republic of Congo, Djibouti, Equatorial Guinea, Eritrea, Ethiopia, Gabon, Gambia, Ghana, Guinea, Guinea-Bissau, Kenya, Lesotho, Liberia, Madagascar, Malawi, Mali, Mauritania, Mauritius, Mozambique, Namibia, Niger, Nigeria, Reunion, Rwanda, Sao Tome and Principe, Senegal, Seychelles, Sierra Leone, Somalia, South Africa, Saint Helena, Swaziland, Tanzania, Togo, Uganda, Zambia, Zimbabwe |

50

### S3 General Material Cycle System Definition in Economy-wide Material Flow Analysis

The system boundary in economy-wide material flow accounting is defined along the System of National Accounts as seen in Fig. S3, starting from: 1. the extraction of primary (i.e., raw, crude or virgin) materials from the national environment and the discharge of materials to the national environment; 2. the political (administrative) borders that determine material flows to and from the rest of the world (imports and exports). Natural flows into and out of a geographical territory are excluded. The key unit of measurement in MFA are metric tons (Krausmann, 2017; Graedel, 2019). Economy-wide material flow accounts (EW-MFA) are rich empirical databases reporting domestic extraction and physical trade for all economies of the world, differentiating 50-60 raw material types (Eurostat, 2018; UNEP and IRP, 2023). From this data, policy-relevant headline indicators are being derived, such as “Domestic Material Consumption” (DMC), in combination with an MRIO, the “material footprint” (MF), as well as relative indicators such as “Resource Productivity” (GDP/DMC or GDP/MF). These indicators are widely used for European and international policy such as in European Green Deal or SDG targets 8 and 12 (Lenzen et al., 2022; European Commission, 2020). Recently, EW-MFA has been further developed by integrating different socio-economic uses of material flows, material stock dynamics, as well as waste and GHG emissions, which enables analysing circular economies (Haas et al., 2020; Kovanda, 2021; Schandl and Miatto, 2018), as well as deriving policy-relevant circular economy indicators for national economies (Mayer, 2019; European Commission, 2023; BMK, 2022).

Recently, research has begun expanding this framework towards explicitly including material stocks and industrial processes and supply chains, opening up the black of “the economy” shown below. This required merging principles of material flow analysis which is relatively flexible, with the standardized economy-wide approach; resulting in a novel approach termed economy-wide material and energy flow analysis (Plank, 2022; Wiedenhofer 2019). For the MESSAGEix-Materials module, we draw on these recent developments to develop the integrative system definition shown in Fig. 1 in the main text.

75

80

85 **Figure S3** Economy-wide material balance scheme (excluding air and water flows) (European Commission, 2001)

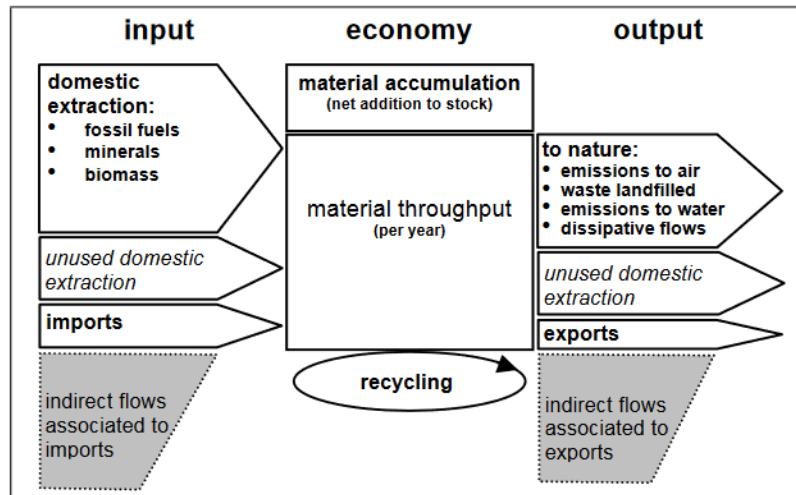

90

95

100

105

## S4 Additional Details for Integrative System Definition

110 This table provides additional information on the Fig. 1 that is presented in the main text. For each process, the mass balance is shown based on the inflows and outflows in the column "Mass Balance". In addition, some generic flows that require more explanation about these processes are also listed in the column "Additional Description of Flows". For example, the term waste is used in general for many processes and the details about the type of waste are provided. The column "Material Levels for Outflows in the Model" shows to which "level" the outflows from the processes go in the model. The definition of model levels and the Reference Material System approach is explained in Sect. 2.2.

115

**Table S4** Additional Details for Processes in Integrative System Definition

| Process                          | Mass Balance<br>(inflow = outflow)                                    | Additional Description of Flows                                                                                                                                                 | Material Levels for<br>Outflows in the<br>Model          |
|----------------------------------|-----------------------------------------------------------------------|---------------------------------------------------------------------------------------------------------------------------------------------------------------------------------|----------------------------------------------------------|
| P1: Extraction                   | $F_{0,1} = F_{1,2} + F_{1,6}$                                         | $F_{1,6}$ : Extraction losses.                                                                                                                                                  | primary_material                                         |
| P2: Production                   | $F_{1,2} = F_{2,3} + F_{2,6}$                                         | $F_{2,6}$ : Waste or by-products that occur during production e.g. blast furnace slag.                                                                                          | secondary_material<br>ertiary_material<br>final_material |
| P3: Finishing                    | $F_{2,3} + F_{8,3} = F_{3,4} + F_{3,6} + F_{1,3} - F_{e,3}$           | $F_{3,4}$ : Product in semi-finished state.<br>$F_{3,6}$ : Waste or by-product that occur during the finishing process                                                          | useful_material                                          |
| P4: Manufacturing                | $F_{3,4} = F_{4,5} + F_{4,8}$                                         | $F_{4,8}$ : New scrap generated during manufacturing of metals. It directly goes to recycling.                                                                                  | product<br>new_scrap                                     |
| P5: Use phase of material stocks | $F_{4,5} = S1 + S2 - F_{5,6}$                                         | $F_{5,6}$ : This waste flow includes the end-of-life materials from power sector stocks (S1) and from other stocks (S2) defined as a share of the quantity of generic products. | end_of_life                                              |
| P6: Waste Collection             | $F_{1,6} + F_{2,6} + F_{3,6} + F_{5,6} + F_{8,6} = F_{6,7} + F_{6,9}$ | $F_{6,7}$ : Total amount of collected recyclable waste.<br>$F_{6,9}$ : Waste that is not recycled but treated in other ways.<br>$F_{8,6}$ : Recycling losses                    | total_end_of_life_1<br>/2/3<br>old_scrap_1/2/3           |
| P7: Waste Preparation            | $F_{6,7} = F_{7,8}$                                                   | $F_{7,8}$ : There are no losses in the waste material but just energy is consumed for preparing recyclable waste for recycling.                                                 | new_scrap                                                |
| P8: Recycling                    | $F_{4,8} + F_{7,8} = F_{8,3}$                                         | -                                                                                                                                                                               | final_material                                           |
| P9: Final Waste Treatment        | $F_{6,9} = F_{9,0}$                                                   | $F_{9,0}$ : Amount of non-recyclable waste                                                                                                                                      | -                                                        |



## S5 Generic Representation of Material Cycles in MESSAGEix-Materials

120 Figure S5 shows the generic representation of material cycles in MESSAGEix-Materials by using the reference material system approach. All the thermal energy needs during these steps are satisfied by a set of generic furnace technologies seen at the left of the figure. These technologies allow fuel switching and enable different decarbonization pathways for the high-temperature heat demand in the industry. Below the figure, it is shown how the different processes from Fig. 1 relate to the reference material system.

125

**Figure S5** Generic representation of material cycles in MESSAGEix-Materials.

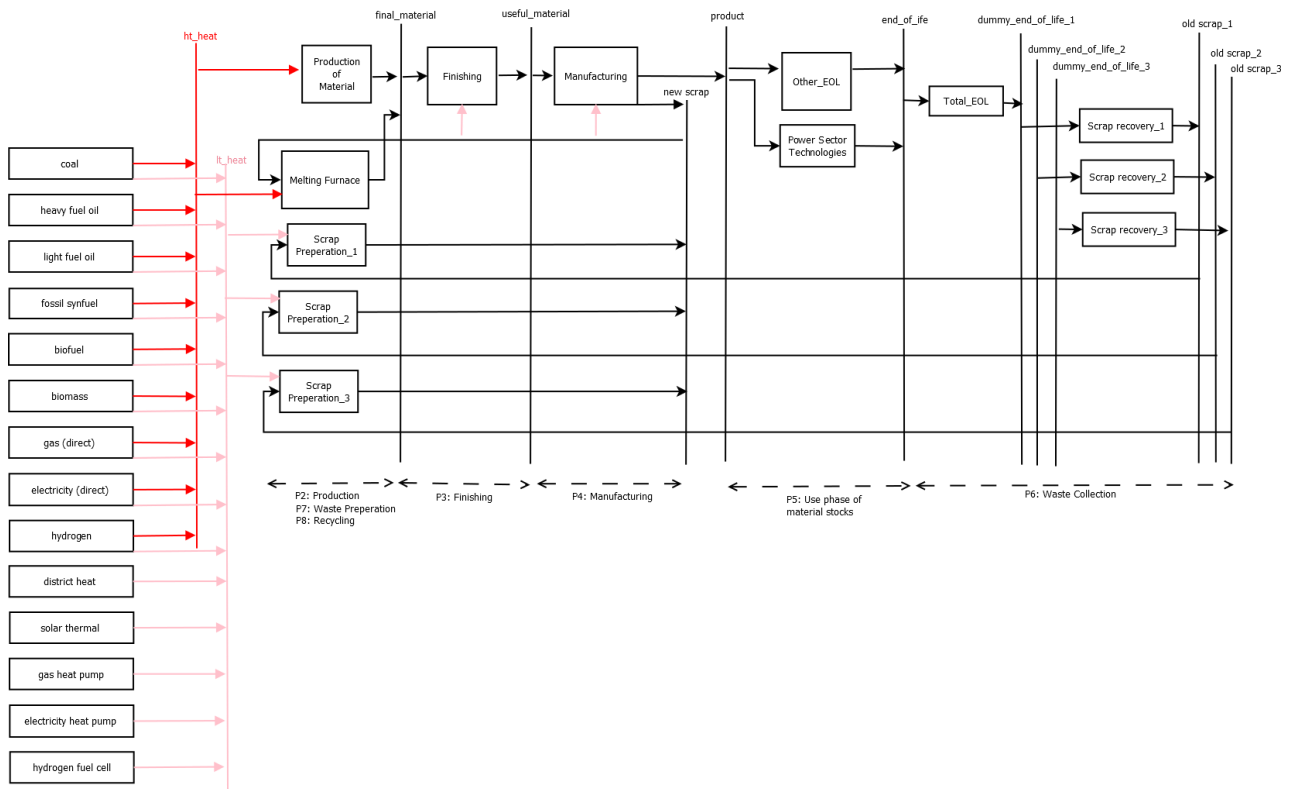

130

135 **S6 Integration of MESSAGEx-Materials**

Figure S6 shows the integration of MESSAGEx-Materials which is depicted as Reference Material System with a MESSAGEx-GLOBIOM base scenario which is referred as Reference Energy System. GDP-driven energy demand consists of transportation, buildings and the residual industry for the sectors that are not explicitly represented in the model. Material demand is either GDP driven and exogenously provided or can be endogenously represented such as the power sector that is connected to the Reference Material System (see section 2.3). Similarly, other demand side modules such as transport and buildings can be also added to the framework and provide information on material demand and end-of-life material release which is not available in this version.

145 **Figure S6** Integration of MESSAGEx-Materials in MESSAGEx framework

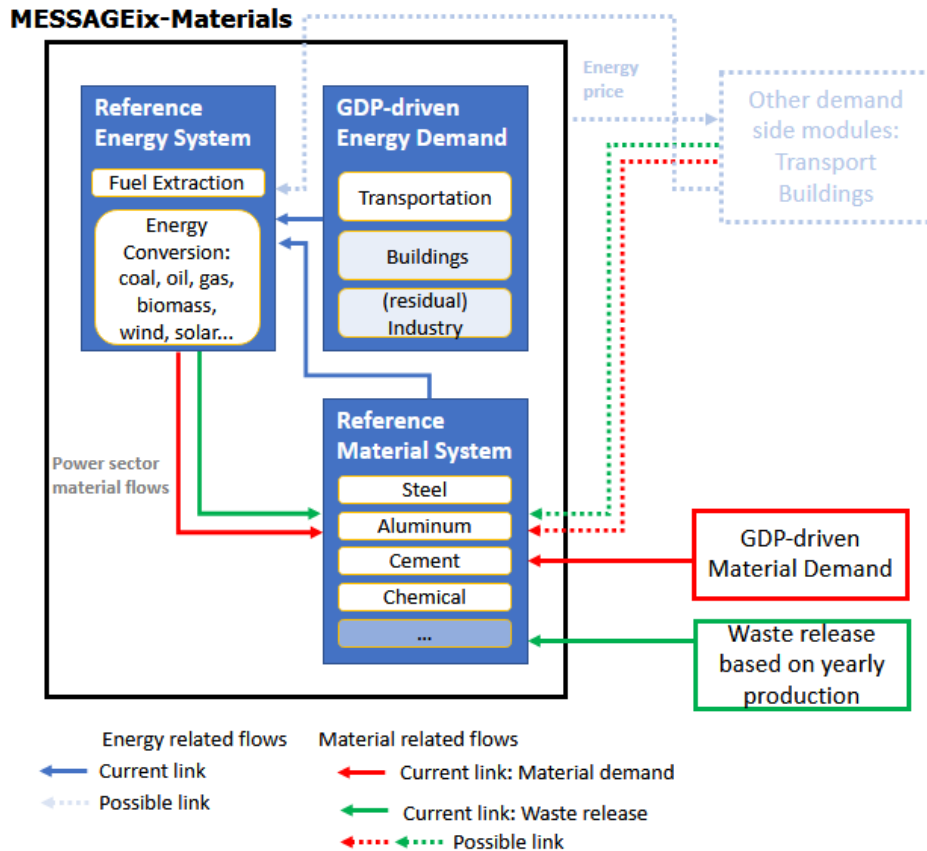

150 **S7 Extension of MESSAGEix Model Formulation**

It is mentioned in the main text that the MESSAGEix formulation currently can represent flows related to the activity (operation) of the technologies such as the energy flows. Figure S7 shows the newly added parameters to the model formulation and how they work to represent material flows related to the technology capacity. Boxes represent the decision variables in the model. Blue boxes that represent activity (ACT) and the purple ones that represent capacity (CAP) are already part of the current model formulation together with the parameters *input* and *output* associated with technology activity (e.g., coal input to produce 1 GWh of electricity). The parameters associated with the capacity are newly added. These flows can be either related to newly built capacity (CAP\_NEW) or existing cumulative capacity (CAP). Material flows related to construction use CAP\_NEW variable while material flows related to retirement and maintenance use CAP variable in the formulation.

155

160

**Figure S7** Change of model formulation to represent the material flows related to technology capacity

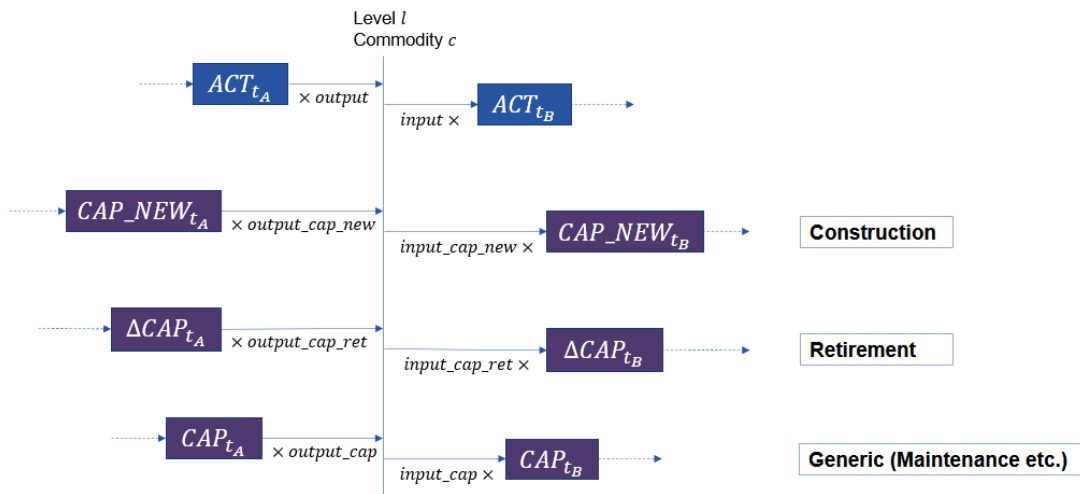

ACT: Activity of a technology (yearly average over period duration)

CAP\_NEW: Newly installed capacity (yearly average over period duration)

165 CAP: Total maintained capacity in an operational and vintage year combination

input: Relative share of input per unit of activity

output: Relative share of output per unit of activity

output\_cap\_new: Relative share of output per unit of new capacity built. (Material released during the construction of a technology).

input\_cap\_new: Relative share of input per unit of new capacity built. (Material needed to build a certain capacity of a technology).

170 output\_cap\_ret: Relative share of output per unit of capacity retired. (Scrap material that becomes available as a result of the retirement of a technology.)

input\_cap\_ret: Relative share of input per unit of capacity retired. (Material needed for the retirement of certain capacity of a technology.)

output\_cap: Relative share of output per unit of capacity. (Material released during the operation of a technology.)

input\_cap: Relative share of input per unit of capacity. (Material needed during the lifetime of a technology for example for maintenance.)

The comparison of the 2020 model values and statistical values is provided in the main text. Table S8.1 is the collection of data sources that are used as the expected values for 2020 based on different sources (IEA, British Geological Survey, Statista). Table S8.2, S8.3 and S8.4 provide extra details on the comparison of the material stocks from power sector in 2015 in MESSAGEix-Materials with the other literature studies.

**Table S8.1** Sources for data comparison between 2020 model values and statistics per industry sector

| Industry Sector | Final Energy                                                                                                                                                                                                                                                                                                                                                                                                              | Production                                                                                                                                                                                                                                                                                                                  | Emissions                                                                                                                                                                                                                                                                                                                                                                                                                                                                               |
|-----------------|---------------------------------------------------------------------------------------------------------------------------------------------------------------------------------------------------------------------------------------------------------------------------------------------------------------------------------------------------------------------------------------------------------------------------|-----------------------------------------------------------------------------------------------------------------------------------------------------------------------------------------------------------------------------------------------------------------------------------------------------------------------------|-----------------------------------------------------------------------------------------------------------------------------------------------------------------------------------------------------------------------------------------------------------------------------------------------------------------------------------------------------------------------------------------------------------------------------------------------------------------------------------------|
| Iron and steel  | IEA: Final energy demand of selected heavy industry sectors by fuel, IEA, Paris, <a href="https://www.iea.org/data-and-statistics/charts/final-energy-demand-of-selected-heavy-industry-sectors-by-fuel-2019">https://www.iea.org/data-and-statistics/charts/final-energy-demand-of-selected-heavy-industry-sectors-by-fuel-2019</a><br><br>*Final energy demand includes blast furnace and coke oven energy consumption. | Statista. (2023). World crude steel production (September 1, 2023). <a href="https://www.statista.com/statistics/267264/world-crude-steel-production/">https://www.statista.com/statistics/267264/world-crude-steel-production/</a>                                                                                         | 1880 Mt production * 1.42 (emission intensity of iron and steel production in 2020)<br><br>IEA: Direct CO2 intensity of the iron and steel sector in the Net Zero Scenario, 2010-2030, IEA, Paris <a href="https://www.iea.org/data-and-statistics/charts/direct-co2-intensity-of-the-iron-and-steel-sector-in-the-net-zero-scenario-2010-2030">https://www.iea.org/data-and-statistics/charts/direct-co2-intensity-of-the-iron-and-steel-sector-in-the-net-zero-scenario-2010-2030</a> |
| Cement          | IEA: Final energy demand of selected heavy industry sectors by fuel, IEA, Paris, <a href="https://www.iea.org/data-and-statistics/charts/final-energy-demand-of-selected-heavy-industry-sectors-by-fuel-2019">https://www.iea.org/data-and-statistics/charts/final-energy-demand-of-selected-heavy-industry-sectors-by-fuel-2019</a>                                                                                      | IEA: Global cement production in the Net Zero Scenario, 2010-2030, IEA, Paris <a href="https://www.iea.org/data-and-statistics/charts/global-cement-production-in-the-net-zero-scenario-2010-2030-5260">https://www.iea.org/data-and-statistics/charts/global-cement-production-in-the-net-zero-scenario-2010-2030-5260</a> | IEA: CO2 emitted and captured in the cement sector and clinker-to-cement ratio in the Net Zero Scenario: 2015-2030, IEA, Paris, <a href="https://www.iea.org/data-and-statistics/charts/co2-emitted-and-captured-in-the-cement-sector-and-clinker-to-cement-ratio-in-the-net-zero-scenario-2015-2030">https://www.iea.org/data-and-statistics/charts/co2-emitted-and-captured-in-the-cement-sector-and-clinker-to-cement-ratio-in-the-net-zero-scenario-2015-2030</a>                   |
| Aluminium       | IEA: World Energy Statistics and Balances, IEA [dataset], <a href="https://doi.org/10.1787/data-00512-en">https://doi.org/10.1787/data-00512-en</a> , 2019 value                                                                                                                                                                                                                                                          | <u>Primary Production:</u><br>British Geological Survey, World mineral production 2017-21<br><br><u>Secondary Production:</u><br>International Aluminum Institute, Global Aluminum Cycle, 2018. <a href="https://alucycle.world-aluminium.org/public-access/">https://alucycle.world-aluminium.org/public-access/</a>       | IEA, Industry direct CO2 emissions in the Sustainable Development Scenario, 2000-2030, IEA, Paris <a href="https://www.iea.org/data-and-statistics/charts/industry-direct-co2-emissions-in-the-sustainable-development-scenario-2000-2030">https://www.iea.org/data-and-statistics/charts/industry-direct-co2-emissions-in-the-sustainable-development-scenario-2000-2030</a><br><br>2018 value                                                                                         |
| Chemicals       | <u>Non-Energy Use:</u><br>IEA Sankey Diagram:                                                                                                                                                                                                                                                                                                                                                                             | <u>For Ammonia:</u><br>IEA Ammonia Technology                                                                                                                                                                                                                                                                               | IEA: Direct CO2 emissions from primary chemical production in the Net Zero                                                                                                                                                                                                                                                                                                                                                                                                              |

|                                                                                                                                                                                                                                                                                                                                                                                                                                                                                                                                                        |                                                                                                                                                                                |                                                                                                                                                                                                                                                                                                                                                                                                                                                                                                      |
|--------------------------------------------------------------------------------------------------------------------------------------------------------------------------------------------------------------------------------------------------------------------------------------------------------------------------------------------------------------------------------------------------------------------------------------------------------------------------------------------------------------------------------------------------------|--------------------------------------------------------------------------------------------------------------------------------------------------------------------------------|------------------------------------------------------------------------------------------------------------------------------------------------------------------------------------------------------------------------------------------------------------------------------------------------------------------------------------------------------------------------------------------------------------------------------------------------------------------------------------------------------|
| <p><a href="https://www.iea.org/sankey/#?c=World&amp;s=Final%20consumption,2020">https://www.iea.org/sankey/#?c=World&amp;s=Final%20consumption,2020</a> value.</p> <p><u>Calculation of Energy Use</u></p> <p><u>Excluding Feedstock:</u></p> <p>Share of primary chemicals (47%) * IEA value (IEA Sankey Diagram, 2020 value (covering all chemicals))</p> <p><u>Share of primary chemicals in final energy:</u></p> <p>IEA, ICCA, DECHEMA: Technology Roadmap Energy and GHG Reductions in the Chemical Industry via Catalytic Processes, 2013.</p> | <p>Roadmap, 2020</p> <p><u>For High Value Chemicals:</u></p> <p>IEA The Future of Petrochemicals, 2017 value</p> <p><u>Methanol:</u></p> <p>Methanol Institute, 2019 value</p> | <p>Scenario: 2015-2030, IEA, Paris, <a href="https://www.iea.org/data-and-statistics/charts/direct-co2-emissions-from-primary-chemical-production-in-the-net-zero-scenario-2015-2030">https://www.iea.org/data-and-statistics/charts/direct-co2-emissions-from-primary-chemical-production-in-the-net-zero-scenario-2015-2030</a></p> <p>Methanol emissions multiplied with the share of the methanol used as feedstock in the industry:</p> <p>222 * 0.67 = 149</p> <p>Methanol Institute, 2019</p> |
|--------------------------------------------------------------------------------------------------------------------------------------------------------------------------------------------------------------------------------------------------------------------------------------------------------------------------------------------------------------------------------------------------------------------------------------------------------------------------------------------------------------------------------------------------------|--------------------------------------------------------------------------------------------------------------------------------------------------------------------------------|------------------------------------------------------------------------------------------------------------------------------------------------------------------------------------------------------------------------------------------------------------------------------------------------------------------------------------------------------------------------------------------------------------------------------------------------------------------------------------------------------|

185 **Table S8.2** Exogenous data on globally installed capacity of electricity generation technologies in 2015 used by MESSAGEix-Materials (this work), Kalt et al. (2021) and Deetman et al. (2021). The three sources use different sets of technology classifications, which were mapped to the common technology set shown in the table below. Data from Deetman et al. (2021) are for the scenario ‘BL default’. UNIT: GW

| Global capacity 2015 [GW] | MESSAGEix-Materials (this work) | Kalt et al. (2021) | Deetman et al (2021) |
|---------------------------|---------------------------------|--------------------|----------------------|
| Bioenergy & MSW           | 50.0                            | 106.7              | 127.3                |
| Coal                      | 1,858.5                         | 1,991.6            | 1,349.9              |
| Gas                       | 1,621.8                         | 1,561.0            | 1,200.6              |
| Geothermal                | -                               | 11.8               | -                    |
| Hydro                     | 1,045.1                         | 1,200.0            | 1,204.2              |
| Nuclear                   | 352.3                           | 343.2              | 394.8                |
| Oil                       | 464.1                           | 384.1              | 341.5                |
| Solar CSP                 | 4.7                             | 4.7                | 4.3                  |
| Solar PV                  | 222.6                           | 220.1              | 175.3                |
| Tidal                     | -                               | 0.5                | -                    |
| Wind Offshore             | 12.0                            | 11.7               | 8.8                  |
| Wind Onshore              | 425.7                           | 404.9              | 360.3                |
| Other                     | -                               | -                  | 12.6                 |
| Sum                       | 6,057.0                         | 6,240.4            | 5,179.5              |

195 **Table S8.3** Material intensities assumed in MESSAGEix-Materials (this work), Kalt et al. (2021) and Deetman et al. (2021). Where sources report different technology types for one technology category in table above, we calculated the mean for the table categories. For some sources in which regions showed different material intensities. Here we report the minimum and maximum over all regions for MESSAGE-Materials. For Kalt et al. (2021) regional material intensities only differ for the technology Solar PV, which is reported in comment \*\*. To reproduce results, material intensities for each source and technology capacity need to be multiplied at the highest level of granularity. UNIT: ton/GW

| Technology         | Material | MESSAGEix-<br>Materials max | MESSAGEix-<br>Materials min | Kalt_low | Kalt_med | Kalt_high | Deetman |
|--------------------|----------|-----------------------------|-----------------------------|----------|----------|-----------|---------|
| Bioenergy &<br>MSW | aluminum | 1,186                       | 1,166                       | 1,000    | 2,250    | 3,500     | 288     |
|                    | cement*  | 54,892                      | 54,369                      | 57,000   | 81,000   | 105,000   | 26,380  |
|                    | steel    | 167,599                     | 166,414                     | 70,000   | 197,500  | 325,000   | 39,756  |
| Coal               | aluminum | 2,246                       | 2,175                       | 200      | 1,600    | 3,000     | 520     |
|                    | cement*  | 17,812                      | 17,625                      | 15,000   | 41,250   | 67,500    | 44,739  |
|                    | steel    | 41,486                      | 41,120                      | 30,000   | 65,000   | 100,000   | 82,567  |
| Gas                | aluminum | 1,239                       | 1,211                       | 100      | 850      | 1,600     | 432     |
|                    | cement*  | 8,360                       | 8,284                       | 6,750    | 9,000    | 11,250    | 7,102   |
|                    | steel    | 19,168                      | 19,034                      | 10,000   | 30,000   | 50,000    | 9,492   |
| Hydro              | aluminum | 9,264                       | 8,317                       | 269      | 572      | 876       | -       |
|                    | cement*  | 285,209                     | 254,763                     | 375,000  | 787,500  | 1,200,000 | 424,893 |
|                    | steel    | 457,091                     | 407,553                     | 20,000   | 45,000   | 70,000    | 70,694  |
| Nuclear            | aluminum | 1,015                       | 965                         | 200      | 600      | 1,000     | 79      |
|                    | cement*  | 62,410                      | 61,975                      | 60,000   | 97,500   | 135,000   | 35,285  |
|                    | steel    | 75,698                      | 75,254                      | 70,000   | 90,000   | 110,000   | 43,457  |
| Oil                | aluminum | 1,239                       | 1,211                       | 650      | 1,000    | 1,350     | 600     |
|                    | cement*  | 8,360                       | 8,284                       | 7,500    | 9,375    | 11,250    | 32,004  |
|                    | steel    | 19,168                      | 19,034                      | 15,000   | 32,500   | 50,000    | 83,499  |
| Solar CSP          | aluminum | 18,855                      | 13,184                      | 2,600    | 13,300   | 24,000    | 5,500   |

|               |          |         |         |         |         |         |         |
|---------------|----------|---------|---------|---------|---------|---------|---------|
|               | cement*  | 365,484 | 162,458 | 15,000  | 69,750  | 124,500 | 202,772 |
|               | steel    | 690,726 | 483,985 | 170,000 | 510,000 | 850,000 | 576,236 |
| Solar PV**    | aluminum | 21,989  | 16,416  | 29,150  | 44,575  | 60,000  | 10,176  |
|               | cement*  | 29,301  | 20,684  | 11,515  | 54,542  | 97,570  | -       |
|               | steel    | 69,544  | 51,530  | 43,150  | 106,827 | 170,503 | 150,000 |
| Wind Offshore | aluminum | 3,654   | 2,189   | 784     | 2,683   | 4,582   | 1,438   |
|               | cement*  | 69,651  | 42,010  | -       | 118,650 | 237,300 | 76,370  |
|               | steel    | 494,633 | 295,361 | 250,000 | 400,000 | 550,000 | 157,942 |
| Wind Onshore  | aluminum | 5,263   | 1,671   | 784     | 2,683   | 4,582   | 868     |
|               | cement*  | 111,602 | 35,645  | 38,100  | 75,300  | 112,500 | 65,093  |
|               | steel    | 355,424 | 113,489 | 100,000 | 142,290 | 184,580 | 121,376 |

200 \* material intensities for concrete from Deetman et al. (2021) and Kalt et al. (2021) were re-calculated to cement intensities at an assumed cement content of 15% in concrete\*\*material intensities of Kalt et al. (2021) are different between regions for Solar PV power plants; the respective minimum and maximum intensities are respectively (t/GW): 18,440/29,150 (aluminum\_low), 39,220/44,575 (aluminum\_med), 60,000/60,000 (aluminum\_high), 25,858/76,767 (concrete\_low), 122,481/363,615 (concrete\_med), 219,104/650,464 (concrete\_high), 19,840/43,150 (steel\_low), 55,215/106,827 (steel\_med), 90,590/170,503 (steel\_high)

Note on data from Deetman et al. (2021):

- 205
- From USA/Canada comparison: For Deetman et al., material stock results varied slightly for the year 2015 (0-2.2% per material) in different scenarios, indicating slight deviations of base data. Due to the small differences, we did not follow up on these but instead used the baseline scenario ('BL' + 'default'; see resp. study for details)

210

215

**Table S8.4:** Data for Fig. 11. Data from Deetman et al. (2021) slightly differ for the base year 2015, the results here represent the scenario ‘BL default’.

| unit:<br>Mt               | Aluminum          |             |              |              |               | Steel             |             |              |              |               | Cement            |             |              |              |               |
|---------------------------|-------------------|-------------|--------------|--------------|---------------|-------------------|-------------|--------------|--------------|---------------|-------------------|-------------|--------------|--------------|---------------|
| technology                | MES<br>SAG<br>Eix | Deet<br>man | Kalt_l<br>ow | Kalt_<br>med | Kalt_<br>high | MES<br>SAG<br>Eix | Deet<br>man | Kalt_l<br>ow | Kalt_<br>med | Kalt_<br>high | MES<br>SAG<br>Eix | Deet<br>man | Kalt_l<br>ow | Kalt_<br>med | Kalt_<br>high |
| Bioen<br>ergy<br>&<br>MSW | 0.06              | 0.06        | 0.11         | 0.24         | 0.37          | 8.36              | 7.53        | 7.47         | 21.08        | 34.69         | 2.73              | 4.19        | 6.08         | 8.65         | 11.21         |
| Coal                      | 4.11              | 0.68        | 0.40         | 3.19         | 5.97          | 76.75             | 114.2<br>0  | 59.75        | 129.4<br>5   | 199.1<br>6    | 32.94             | 71.43       | 29.87        | 82.15        | 134.4<br>3    |
| Gas                       | 1.97              | 0.59        | 0.16         | 1.33         | 2.50          | 30.95             | 17.66       | 15.61        | 46.83        | 78.05         | 13.48             | 9.41        | 10.54        | 14.05        | 17.56         |
| Hydro                     | 9.31              | -           | 0.32         | 0.69         | 1.05          | 457.4<br>3        | 85.13       | 24.00        | 54.00        | 84.00         | 284.9<br>5        | 511.6<br>6  | 449.9<br>8   | 944.9<br>7   | 1,439.<br>95  |
| Nucle<br>ar               | 0.34              | 0.03        | 0.07         | 0.21         | 0.34          | 26.60             | 17.16       | 24.03        | 30.89        | 37.75         | 21.89             | 13.93       | 20.59        | 33.46        | 46.33         |
| Oil                       | 0.57              | 0.20        | 0.25         | 0.38         | 0.52          | 8.87              | 24.89       | 5.76         | 12.48        | 19.21         | 3.86              | 10.93       | 2.88         | 3.60         | 4.32          |
| Solar<br>CSP              | 0.07              | 0.02        | 0.01         | 0.06         | 0.11          | 2.36              | 2.49        | 0.81         | 2.42         | 4.04          | 0.92              | 0.88        | 0.07         | 0.33         | 0.59          |
| Solar<br>PV               | 4.12              | 1.78        | 5.16         | 9.18         | 13.21         | 12.76             | 26.29       | 6.77         | 17.48        | 28.18         | 5.12              | -           | 1.64         | 7.77         | 13.91         |
| Wind<br>Offsh<br>ore      | 0.03              | 0.01        | 0.01         | 0.03         | 0.05          | 4.06              | 1.38        | 2.93         | 4.69         | 6.44          | 0.57              | 0.67        | -            | 1.39         | 2.78          |
| Wind<br>Onsh<br>ore       | 0.91              | 0.31        | 0.32         | 1.09         | 1.86          | 62.43             | 43.73       | 40.49        | 57.61        | 74.73         | 19.60             | 23.45       | 15.43        | 30.49        | 45.55         |
| Geoth<br>ermal            | -                 | -           | 0.04         | 0.06         | 0.08          | -                 | -           | 0.18         | 1.27         | 2.36          | -                 | -           | 0.21         | 0.21         | 0.21          |
| Tidal                     | -                 | -           | 0.00         | 0.00         | 0.00          | -                 | -           | 0.01         | 0.02         | 0.04          | -                 | -           | 0.19         | 0.40         | 0.62          |
| Other                     | -                 | 0.05        | -            | -            | -             | -                 | 2.72        | -            | -            | -             | -                 | 1.94        | -            | -            | -             |



Figure S9.1 Primary Energy, Final Energy by end-use sector, Direct CO2 Emissions by end-use sector respectively

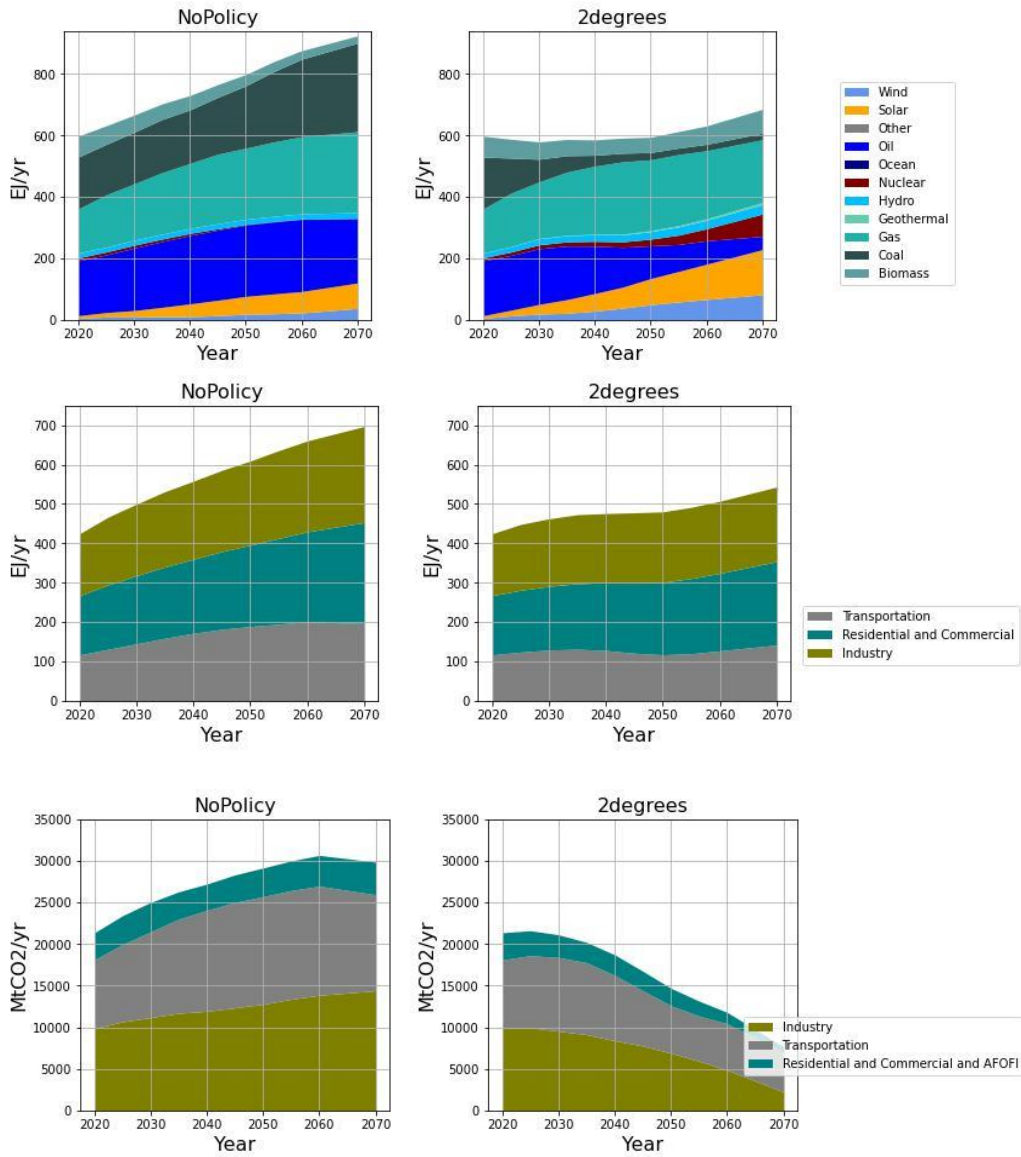

225

240

245 **Figure S9.2** Regional MTO Use

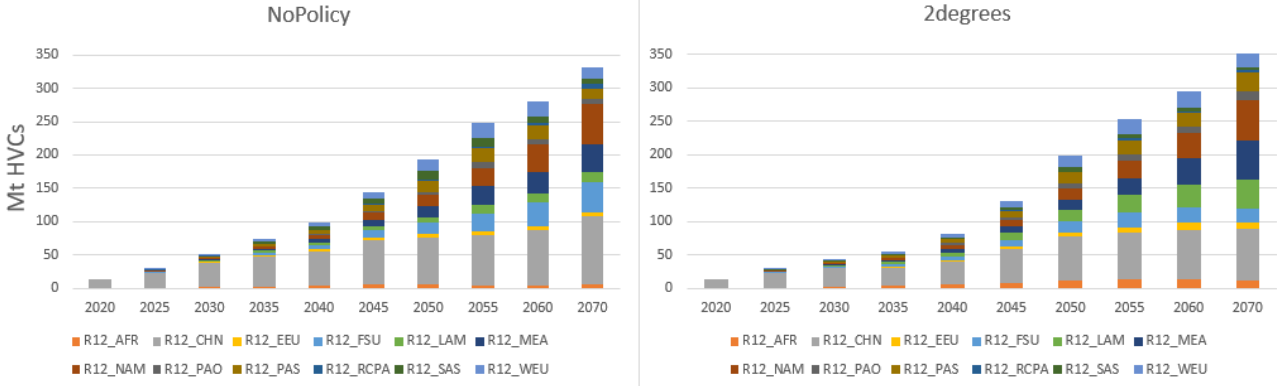

Supplement: Supplementary file 1 [file egusphere-2023-3035-supplement.pdf]
